# Supplementary material for: Sustained Reduction in Severe Hypoglycemia in Adults With Type 1 Diabetes Complicated by Impaired Awareness of Hypoglycemia: Two-Year Follow-up in the HypoCOMPaSS Randomized Clinical Trial
Source: Oxford University Press journal article supplement (doi:10.2337/dc17-2682), 2018-04-16

SUPPLEMENTARY DATA

**Supplementary Table 1. Hypoglycemia awareness, severe hypoglycemia, biomedical and patient-reported outcomes in MDIs vs CSII and SMBG vs RT-CGM comparisons at 24-month endpoint (ITT)**

|                                                                | MDI              | CSII             | P-value | SMBG             | RT-CGM           | P-value |
|----------------------------------------------------------------|------------------|------------------|---------|------------------|------------------|---------|
| Hypoglycemia awareness                                         |                  |                  |         |                  |                  |         |
| Gold score                                                     | 3.5±1.7 (n=29)   | 3.9±2.1 (n=27)   | 0.35    | 3.8±2.0 (n=28)   | 3.5±1.8 (n=28)   | 0.57    |
| Median (IQR)                                                   | 3 (2-4)          | 4 (2-6)          |         | 4 (2-5.5)        | 3 (2-5)          |         |
| Clarke score                                                   | 2.3±2.3 (n=26)   | 2.8±1.9 (n=24)   | 0.39    | 2.7±2.2 (n=25)   | 2.3±2.0 (n=25)   | 0.51    |
| Median (IQR)                                                   | 1 (0-4)          | 3 (1.5-4.5)      |         | 3 (0-5)          | 2 (1-4)          |         |
| HypoA-Q 'Impaired Awareness' scale                             | 7.6±5.0 (n=29)   | 9.2±5.0 (n=28)   | 0.24    | 8.3±5.0 (n=29)   | 8.4±5.1 (n=28)   | 0.90    |
| Median (IQR)                                                   | 8 (3-11)         | 9.5 (4.5-12)     |         | 9 (4-11)         | 8.5 (3.5-12)     |         |
| Severe hypoglycemia                                            |                  |                  |         |                  |                  |         |
| Annualized rate over 24-month follow-up, per person/year       | 0.4±0.8 (n=34)   | 0.4±0.9 (n=35)   | 0.97    | 0.5±1.0 (n=35)   | 0.3±0.6 (n=34)   | 0.33    |
| Median (IQR)                                                   | 0 (0-0.5)        | 0 (0-0.5)        |         | 0 (0-0.5)        | 0 (0-0.5)        |         |
| Proportion affected, %                                         | 40 (n=40)        | 32 (n=38)        | 0.44*   | 32 (n=38)        | 40 (n=40)        | 0.44*   |
| HbA1c, mmol/mol                                                | 62±12 (n=37)     | 61±9 (n=35)      | 0.87    | 61±11 (n=36)     | 61±10 (n=36)     |         |
| Weight, kg                                                     | 75.2±12.7 (n=39) | 75.2±14.3 (n=35) | 0.99    | 75.1±13.7 (n=39) | 75.4±13.2 (n=35) | 0.93    |
| Total daily insulin dose, u/kg                                 | 0.56±0.17 (n=25) | 0.51±0.14 (n=26) | 0.27    | 0.52±0.12 (n=27) | 0.56±0.18 (n=24) | 0.27    |
| Biochemical hypoglycemia, % time interstitial glucose ≤3mmol/L | 2.4±3.8 (n=30)   | 2.8±4.5 (n=25)   | 0.72    | 2.6±3.6 (n=27)   | 2.6±4.6 (n=28)   | 0.98    |
| Satisfaction with diabetes treatment: DTSQ                     |                  |                  |         |                  |                  |         |
| Total satisfaction                                             | 30.7±5.0 (n=29)  | 31.7±4.6 (n=27)  | 0.43    | 31.0±4.8 (n=31)  | 31.3±4.8 (n=25)  | 0.81    |
| Perceived frequency of hyperglycemia                           | 2.9±1.3 (n=29)   | 3.2±1.4 (n=28)   | 0.40    | 3.0±1.3 (n=31)   | 3.2±1.4 (n=26)   | 0.61    |
| Perceived frequency of hypoglycemia                            | 2.4±1.3 (n=29)   | 3.0±1.3 (n=28)   | 0.09    | 2.8±1.3 (n=31)   | 2.6±1.4 (n=26)   | 0.66    |
| Fear of hypoglycemia: HFS-II                                   |                  |                  |         |                  |                  |         |
| Total                                                          | 38.3±26.2 (n=23) | 42.2±27.3 (n=24) | 0.62    | 40.5±24.9 (n=24) | 40.0±28.8 (n=23) | 0.95    |
| Behavior                                                       | 18.3±10.6 (n=24) | 20.4±11.8 (n=25) | 0.52    | 18.7±8.9 (n=26)  | 20.0±13.5 (n=23) | 0.68    |
| Worry                                                          | 20.6±17.5 (n=25) | 22.6±17.3 (n=27) | 0.69    | 23.1±11.3 (n=27) | 20.0±17.5 (n=25) | 0.52    |

SUPPLEMENTARY DATA

Data are mean±SD unless stated otherwise. Number with available data denoted by n number in parentheses. P-values compare MDI and CSII groups at month 24, using two-sample t test, except \*X<sup>2</sup> test.

**Supplementary Table 2. Hypoglycemia awareness, severe hypoglycemia, biomedical and patient-reported outcomes at 24-month endpoint (per protocol): insulin delivery modality (MDI only vs. CSII only vs. switched) and RT-CGM use (<50% of time vs ≥50% of time)**

|                                                                | Insulin delivery modality throughout 24-month study (n=80) |                              |                  | RT-CGM use (n=14) |                 |
|----------------------------------------------------------------|------------------------------------------------------------|------------------------------|------------------|-------------------|-----------------|
|                                                                | MDI only (n=10)                                            | Switched (MDI & CSII) (n=45) | CSII only (n=25) | <50% time (n=6)   | ≥50% time (n=8) |
| Hypoglycemia awareness                                         |                                                            |                              |                  |                   |                 |
| Gold score                                                     | 2.9±1.2 (n=8)                                              | 3.6±1.9 (n=28)               | 3.9±2.1 (n=18)   | 2.8±1.9 (n=5)     | 3.3±2.0 (n=7)   |
| Median (IQR)                                                   | 3 (2-3.5)                                                  | 4 (2-5)                      | 4 (2-6)          | 2 (2-3)           | 3 (2-4)         |
| Clarke score                                                   | 1.4±1.9 (n=7)                                              | 2.5±2.0 (n=25)               | 2.8±2.2 (n=16)   | 1.0±1.4 (n=5)     | 1.8±1.7 (n=6)   |
| Median (IQR)                                                   | 1 (0-3)                                                    | 3 (1-4)                      | 2 (0.5-5)        | 0 (0-2)           | 1.5 (1-2)       |
| HypoA-Q 'Impaired Awareness'                                   | 6.6±3.5 (n=8)                                              | 7.9±5.2 (n=27)               | 9.2±5.2 (n=20)   | 4.2±2.2 (n=5)     | 7.7±5.7 (n=7)   |
| Median (IQR)                                                   | 6 (3.5-10)                                                 | 9 (3-11.5)                   | 9.5 (4-11.5)     | 3 (3-6)           | 5 (3-13)        |
| Severe hypoglycemia                                            |                                                            |                              |                  |                   |                 |
| Annual rate over 24-month follow-up, per person/year           | 0.2±0.5 (n=10)                                             | 0.4±0.8 (n=33)               | 0.5±1.0 (n=25)   | 0.0±0.0 (n=6)     | 0.3±0.4 (n=8)   |
| Median (IQR)                                                   | 0 (0-0.5)                                                  | 0 (0-0)                      | 0 (0-0.5)        | 0 (0-0)           | 0 (0-0.5)       |
| Proportion affected, %                                         | 30 (n=10)                                                  | 36 (n=39)                    | 32 (n=25)        | 0 (n=6)           | 38 (n=8)        |
| HbA1c, mmol/mol                                                | 66±13 (n=9)                                                | 62±11 (n=38)                 | 59±8 (n=23)      | 57±7(n=6)         | 56±9 (n=8)      |
| Weight, kg                                                     | 79.0±11.6 (n=10)                                           | 75.0±13.7 (n=37)             | 73.8±14.2 (n=24) | 73.9±13.8 (n=6)   | 79.9±14.3 (n=8) |
| Total daily insulin dose, u/kg                                 | Data not collected                                         | 0.55±0.16 (n=30)             | 0.52±0.15 (n=20) | 0.58±0.16 (n=5)   | 0.66±0.13 (n=5) |
| Biochemical hypoglycemia, % time interstitial glucose ≤3mmol/L | 2.8±4.8 (n=10)                                             | 2.8±4.7 (n=25)               | 2.3±3.0 (n=18)   | 4.3±8.8 (n=5)     | 3.0±4.8 (n=6)   |
| Satisfaction with diabetes treatment: DTSQ                     |                                                            |                              |                  |                   |                 |
| Total satisfaction                                             | 30.1±2.9 (n=7)                                             | 30.8±6.0 (n=28)              | 31.9±3.4 (n=19)  | 31.2±4.4 (n=5)    | 31.2±5.0 (n=6)  |
| Perceived frequency of hyperglycemia                           | 2.3±0.8 (n=7)                                              | 3.3±1.4 (n=29)               | 3.1±1.4 (n=19)   | 3.2±1.9 (n=5)     | 3.5±1.0 (n=6)   |
| Perceived frequency of hypoglycemia                            | 2.1±1.2 (n=7)                                              | 2.6±1.5 (n=29)               | 3.2±1.1 (n=19)   | 2.4±1.3 (n=5)     | 2.8±1.3 (n=6)   |

SUPPLEMENTARY DATA

|                              | Insulin delivery modality throughout 24-month study<br>(n=80) |                                 |                  | RT-CGM use (n=14) |                 |
|------------------------------|---------------------------------------------------------------|---------------------------------|------------------|-------------------|-----------------|
|                              | MDI only (n=10)                                               | Switched (MDI<br>& CSII) (n=45) | CSII only (n=25) | <50% time (n=6)   | ≥50% time (n=8) |
| Fear of hypoglycemia: HFS-II |                                                               |                                 |                  |                   |                 |
| Total                        | 31.8±15.7 (n=6)                                               | 43.7±29.9 (n=23)                | 39.8±25.7 (n=17) | 24.5±12.1 (n=4)   | 28.1±17.4 (n=7) |
| Behavior                     | 18.3±5.9 (n=6)                                                | 18.8±12.4 (n=24)                | 20.7±11.4 (n=18) | 15.3±6.3 (n=4)    | 16.4±9.0 (n=7)  |
| Worry                        | 13.5±11.2 (n=6)                                               | 26.0±19.4 (n=25)                | 19.1±15.5 (n=19) | 15.0±15.4 (n=5)   | 11.7±10.1 (n=7) |

Data are mean±SD unless stated otherwise. Number with available data denoted by n number in parentheses.

No formal hypothesis testing was performed due to small numbers of observations in certain groups.

Complete RT-CGM usage data were available for 14 of the 17 participants who continued to use RT-CGM.

SUPPLEMENTARY DATA

**Supplementary Figure 1. Flow diagram showing number of participants allocated at random to each intervention, completing the 24-week RCT and completing 24-month follow-up.**

Numbers using MDI and CSII during the RCT and post-RCT follow-up are shown. No participants randomized to SMBG commenced RT-CGM throughout the 24-month study and RT-CGM provision was not withdrawn from any participant randomized to RT-CGM (although not all continued active use, with 11 (30%) confirmed active users of this technology at study completion).

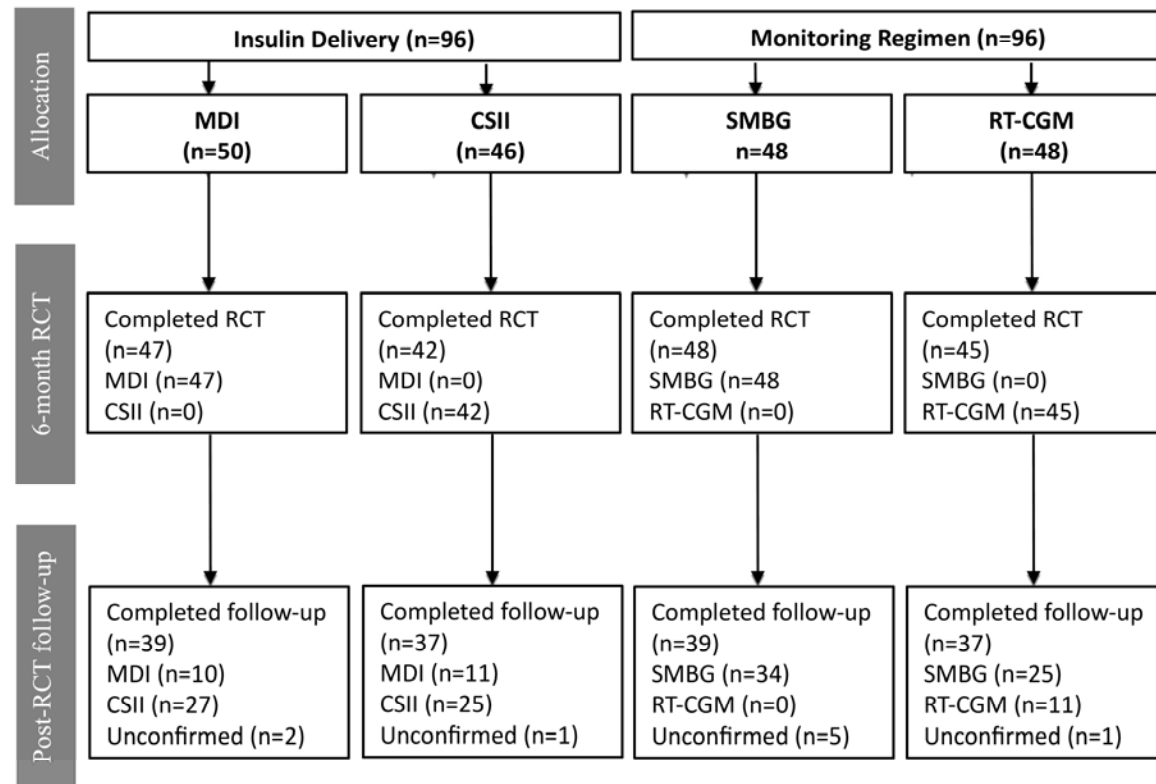

Supplement: dc172682supplementarydata.pdf [file dc172682supplementarydata.pdf]
